# Supplementary material for: Diurnal regulation of RNA polymerase III transcription is under the control of both the feeding–fasting response and the circadian clock
Source: HighWire-hosted journal article supplement (doi:10.1101/gr.217521.116), 2017-03-24
Supplement: Supplemental_Fig_S2.pdf [file Supplemental_Fig_S2.pdf]

**A**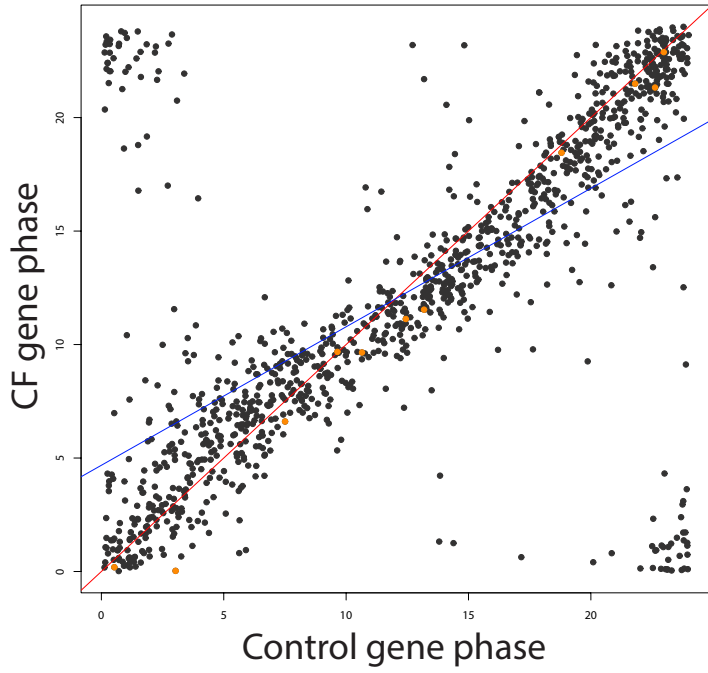**B**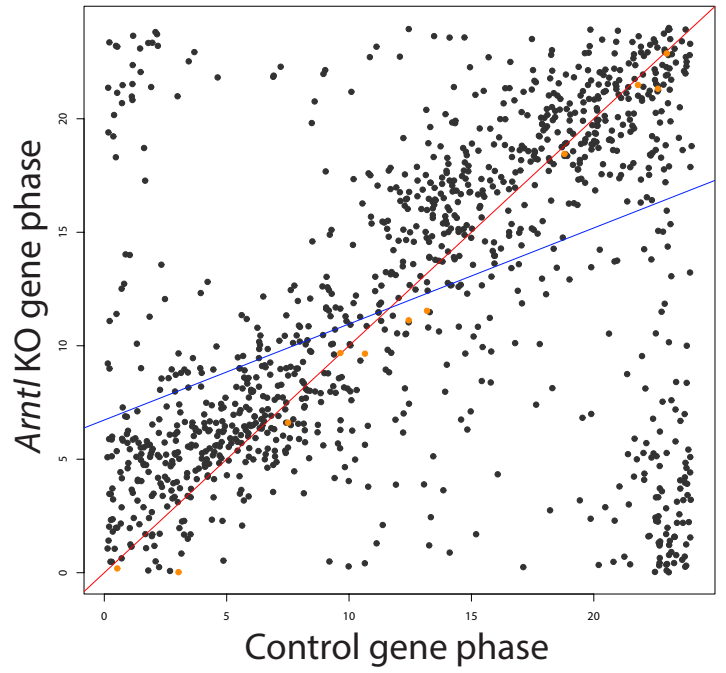**Supplemental Fig. S2. Phase analysis.**

(A) Scatter plots showing phases for the genes in the control dataset in control (x-axis) and CF (y-axis) liver. The red line is the  $X = Y$  line and the blue line is the best fit. The orange dots are circadian-related genes, selected according to gene ontology analysis. (B) As in A but in control (x-axis) and *Arntl* KO (y-axis) liver.
