# Supplementary material for: Diurnal regulation of RNA polymerase III transcription is under the control of both the feeding–fasting response and the circadian clock
Source: HighWire-hosted journal article supplement (doi:10.1101/gr.217521.116), 2017-03-24
Supplement: Supplemental_Fig_S3.pdf [file Supplemental_Fig_S3.pdf]

A

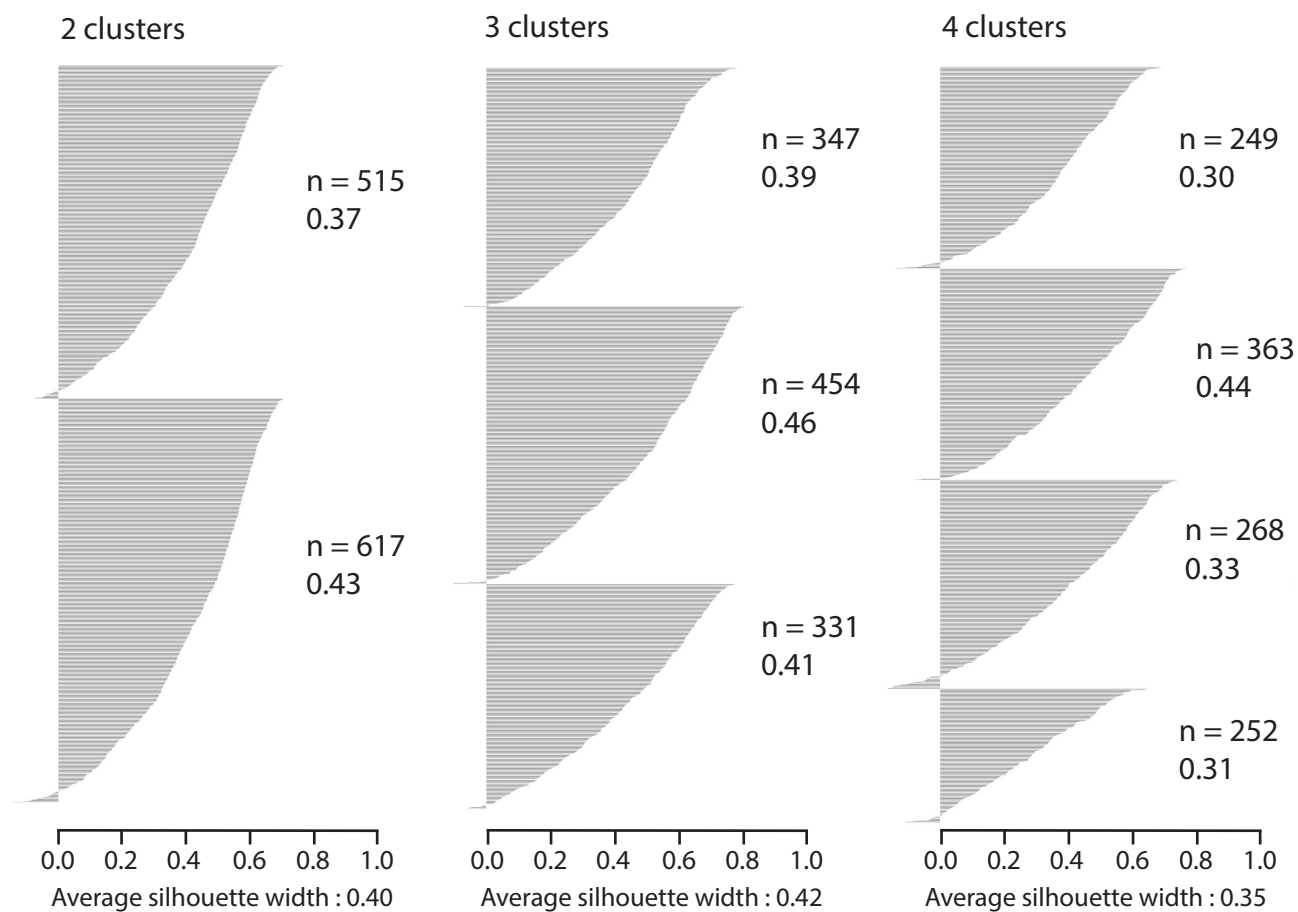

B

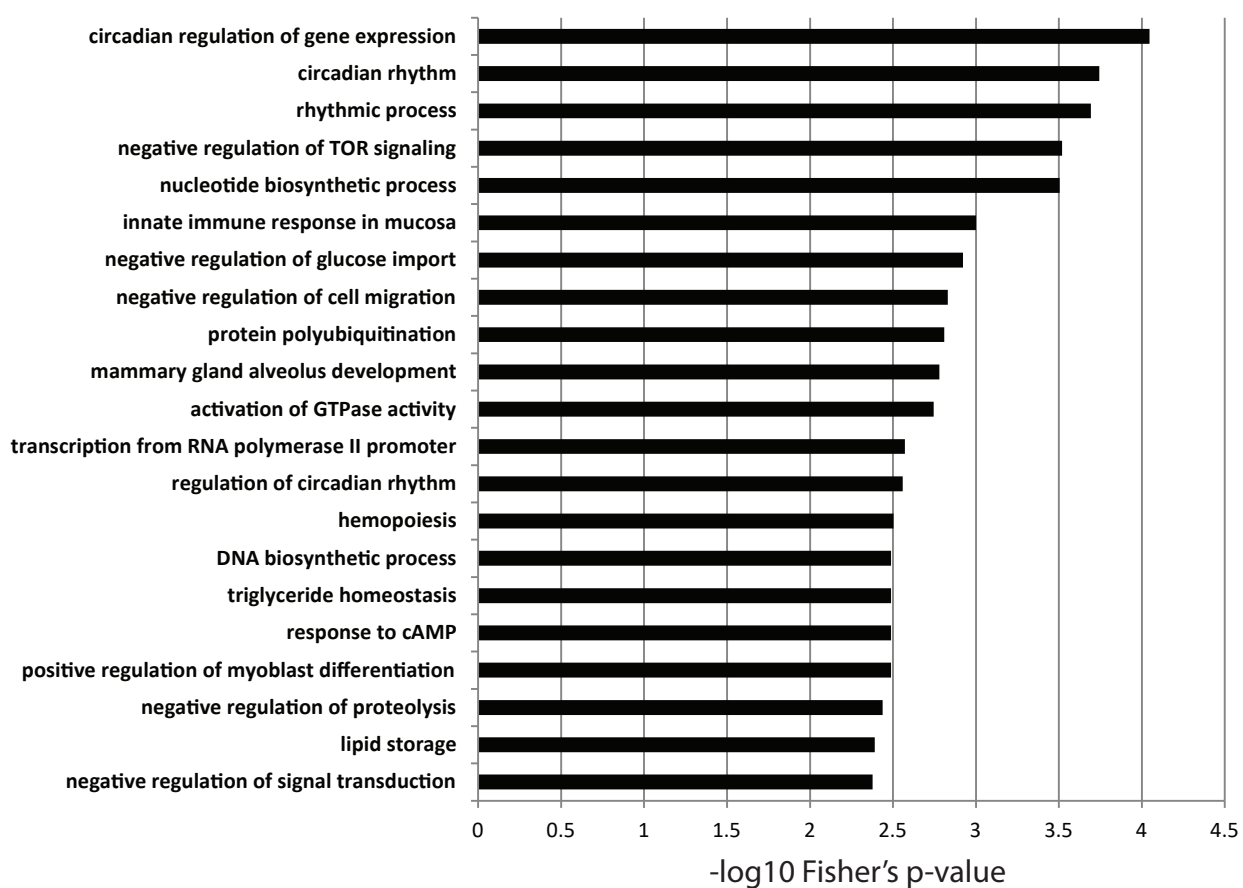

C

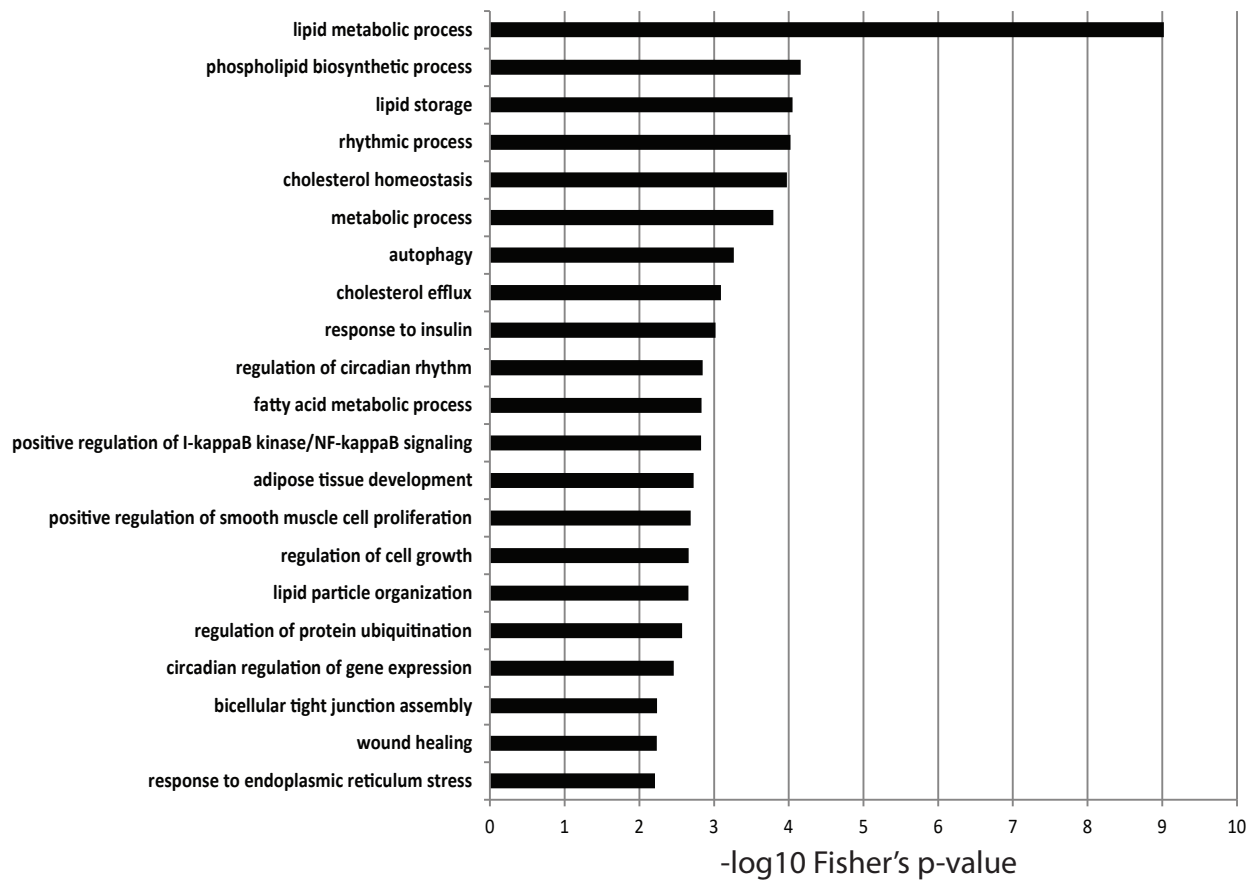

D

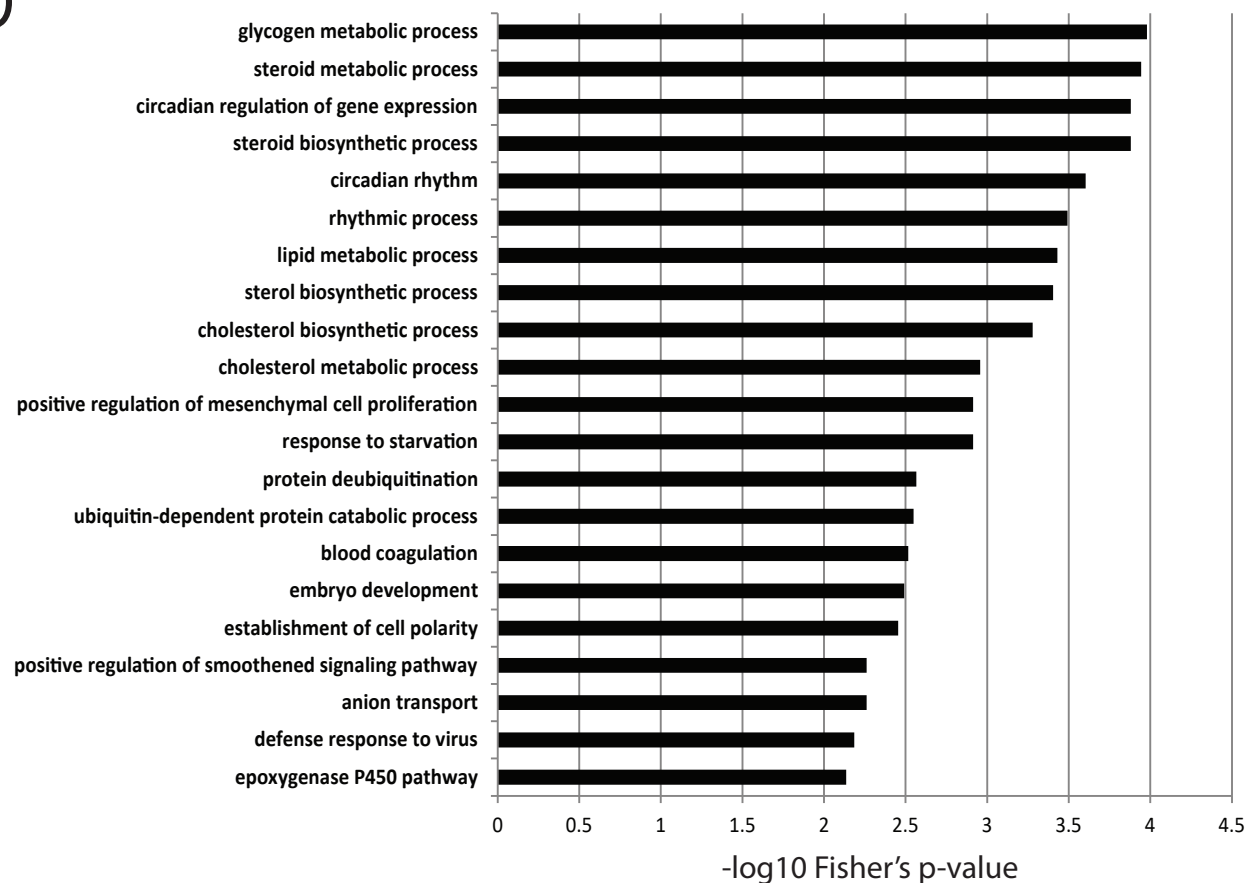

**Supplemental Fig. S3. Gene ontology analysis for the three clusters in the PAM analysis.**

(A) Silhouette analysis of clustering into 2, 3, or 4 clusters for the control rhythmic dataset in the control condition. Each bar represents the silhouette width for a given gene. The number of genes and the average width for each cluster are indicated on the right of each cluster. Clustering into three clusters was chosen for the PAM analysis shown in Figures 2D and S4D. (B) Top 20 GO terms associated with the 347 genes in cluster 1. (C) As in B but for the 454 genes in the cluster 2. (D) As in B but for the 331 genes in the cluster 3. Bars represent the  $-\log_{10}$  of the p-value.
